# Supplementary material for: Brown carbon aerosol in rural Germany: sources, chemistry, and diurnal variations
Source: Copernicus journal article supplement (doi:10.5194/egusphere-2024-1848), 2024-06-26
Supplement: Supplementary file 1 [file egusphere-2024-1848-supplement.pdf]

**Supplement for:**

**Brown carbon aerosol in rural Germany: sources,  
chemistry, and diurnal variations**

*Feng Jiang<sup>1,2\*</sup>, Harald Saathoff<sup>1\*</sup>, Junwei Song<sup>1</sup>, Hengheng Zhang<sup>1</sup>, Linyu Gao<sup>1</sup>, and Thomas  
Leisner<sup>1,3</sup>*

<sup>1</sup>Institute of Meteorology and Climate Research, Karlsruhe Institute of Technology, 76344 Eggenstein–  
Leopoldshafen, Germany

<sup>2</sup>Institute of Applied Geosciences, Working Group for Environmental Mineralogy and Environmental System  
Analysis, Karlsruhe Institute of Technology, 76131 Karlsruhe, Germany

<sup>3</sup>Institute of Environmental Physics, Heidelberg University, 69120 Heidelberg, Germany

*Correspondence to:* Feng Jiang ([feng.jiang@kit.edu](mailto:feng.jiang@kit.edu)) and Harald Saathoff ([harald.saathoff@kit.edu](mailto:harald.saathoff@kit.edu))

Table S1. Instruments installed in the measurement building number 322 at KIT Campus Nord during the campaign from February 17<sup>th</sup> – March 16<sup>th</sup>, 2021.

| <b>Measured parameter</b>                                                             | <b>Instrument</b>                     |
|---------------------------------------------------------------------------------------|---------------------------------------|
| Ambient temperature                                                                   | WS700 (Lufft GmbH)                    |
| Container temperature                                                                 | WS700 (Lufft GmbH)                    |
| Relative humidity                                                                     | WS700 (Lufft GmbH)                    |
| Pressure                                                                              | WS700 (Lufft GmbH)                    |
| Wind speed                                                                            | WS700 (Lufft GmbH)                    |
| Wind direction                                                                        | WS700 (Lufft GmbH)                    |
| Precipitation                                                                         | WS700 (Lufft GmbH)                    |
| Global radiation                                                                      | WS700 (Lufft GmbH)                    |
| O <sub>3</sub>                                                                        | O341M (Environment SA)                |
| NO <sub>2</sub>                                                                       | AS32M (Environment SA)                |
| Particle optical diameter (0.18-18 μm)                                                | OPC FIDAS200 (Palas GmbH)             |
| Black carbon (BC)                                                                     | AE51 Aethalometer (Aethlabs Inc.)     |
| Black carbon (BC)                                                                     | MA200 Aethalometer (Aethlabs Inc.)    |
| Black carbon (BC) and brown carbon (BrC)                                              | AE33 Aethalometer (Magee Inc.)        |
| Particle-phase oxygenated organic molecules (intermittent online analysis of filters) | FIGAERO-CIMS (Aerodyne Research Inc.) |
| Gas phase oxygenated organic molecules (online)                                       | CIMS (Aerodyne Research Inc.)         |
| VOCs/semi-volatile particles                                                          | CHARON-PTR-MS (IONCON Analytik GmbH)  |
| Profiles of aerosol and/or cloud backscatter                                          | LIDAR (Raymetrics Inc.)               |
| Particle number                                                                       | CPC 3789 (TSI Inc.)                   |
| Particle size (10-410 nm)                                                             | Nanoscan (TSI Inc.)                   |

Table S2. Assignment of 171 potential brown carbon molecules and 7 nitro aromatic compounds (red marks) in the particle phase detected at KIT Campus Nord, including mass, formula, double bond equivalent (DBE), the ratio of O/C, and the ratio of H/C.

| Number | Mass (g mol <sup>-1</sup> ) | Formula  | DBE | O/C | H/C |
|--------|-----------------------------|----------|-----|-----|-----|
| 1      | 75                          | C2H4O3   | 1.5 | 1.5 | 1.5 |
| 2      | 104                         | C3H4O4   | 2   | 1.3 | 1.3 |
| 3      | 120                         | C3H4O5   | 2   | 1.7 | 1.3 |
| 4      | 152                         | C3H4O7   | 2   | 2.3 | 1.3 |
| 5      | 168                         | C3H4O8   | 2   | 2.7 | 1.3 |
| 6      | 103                         | C3H5O3N1 | 2   | 1.0 | 1.7 |
| 7      | 135                         | C3H5O5N1 | 2   | 1.7 | 1.7 |
| 8      | 151                         | C3H5O6N1 | 2   | 2.0 | 1.7 |
| 9      | 167                         | C3H5O7N1 | 2   | 2.3 | 1.7 |
| 10     | 183                         | C3H5O8N1 | 2   | 2.7 | 1.7 |
| 11     | 84                          | C4H4O2   | 3   | 0.5 | 1.0 |
| 12     | 116                         | C4H4O4   | 3   | 1.0 | 1.0 |
| 13     | 132                         | C4H4O5   | 3   | 1.3 | 1.0 |
| 14     | 148                         | C4H4O6   | 3   | 1.5 | 1.0 |
| 15     | 164                         | C4H4O7   | 3   | 1.8 | 1.0 |
| 16     | 178                         | C4H4O7N1 | 3   | 1.8 | 1.3 |
| 17     | 180                         | C4H4O8   | 3   | 2.0 | 1.0 |
| 18     | 99                          | C4H5O2N1 | 3   | 0.5 | 1.3 |
| 19     | 131                         | C4H5O4N1 | 3   | 1.0 | 1.3 |
| 20     | 147                         | C4H5O5N1 | 3   | 1.3 | 1.3 |
| 21     | 163                         | C4H5O6N1 | 3   | 1.5 | 1.3 |
| 22     | 179                         | C4H5O7N1 | 3   | 1.8 | 1.3 |
| 23     | 125                         | C5H4O3   | 4   | 0.6 | 0.8 |
| 24     | 205                         | C5H4O8   | 4   | 1.6 | 0.8 |
| 25     | 221                         | C5H4O1   | 4   | 0.2 | 0.8 |
| 26     | 80                          | C5H4O3   | 4   | 0.6 | 0.8 |
| 27     | 112                         | C5H4O4   | 4   | 0.8 | 0.8 |
| 28     | 128                         | C5H4O5   | 4   | 1.0 | 0.8 |
| 29     | 144                         | C5H4O6N1 | 4   | 1.2 | 1.0 |
| 30     | 174                         | C5H4O7   | 4   | 1.4 | 0.8 |
| 31     | 176                         | C5H4O8   | 4   | 1.6 | 0.8 |
| 32     | 208                         | C5H5O1   | 3   | 0.2 | 1.2 |
| 33     | 111                         | C5H5O2   | 3   | 0.4 | 1.2 |
| 34     | 97                          | C5H5O3N1 | 4   | 0.6 | 1.0 |
| 35     | 127                         | C5H5O3   | 3   | 0.6 | 1.2 |
| 36     | 113                         | C5H5O4N1 | 4   | 0.8 | 1.0 |

|    |     |          |   |     |     |
|----|-----|----------|---|-----|-----|
| 37 | 129 | C5H5O5N1 | 4 | 1.0 | 1.0 |
| 38 | 159 | C5H5O6N1 | 4 | 1.2 | 1.0 |
| 39 | 191 | C5H5O7   | 3 | 1.4 | 1.2 |
| 40 | 177 | C5H5O8N1 | 4 | 1.6 | 1.0 |
| 41 | 207 | C5H5O8   | 3 | 1.6 | 1.2 |
| 42 | 112 | C5H6O3   | 3 | 0.6 | 1.2 |
| 43 | 114 | C5H6O4   | 3 | 0.8 | 1.2 |
| 44 | 130 | C5H6O5   | 3 | 1.0 | 1.2 |
| 45 | 160 | C5H6O6   | 3 | 1.2 | 1.2 |
| 46 | 176 | C5H6O7   | 3 | 1.4 | 1.2 |
| 47 | 178 | C5H6O7N1 | 3 | 1.4 | 1.4 |
| 48 | 192 | C5H6O8   | 3 | 1.6 | 1.2 |
| 49 | 194 | C5H6O8N1 | 3 | 1.6 | 1.4 |
| 50 | 99  | C5H7O3N1 | 3 | 0.6 | 1.4 |
| 51 | 115 | C5H7O4N1 | 3 | 0.8 | 1.4 |
| 52 | 131 | C5H7O5N1 | 3 | 1.0 | 1.4 |
| 53 | 147 | C5H7O6N1 | 3 | 1.2 | 1.4 |
| 54 | 163 | C5H7O7N1 | 3 | 1.4 | 1.4 |
| 55 | 193 | C5H7O8N1 | 3 | 1.6 | 1.4 |
| 56 | 195 | C5H7O9N1 | 3 | 1.8 | 1.4 |
| 57 | 153 | C6H3O10  | 5 | 1.7 | 0.7 |
| 58 | 138 | C6H4O4   | 5 | 0.7 | 0.7 |
| 59 | 140 | C6H4O5   | 5 | 0.8 | 0.7 |
| 60 | 156 | C6H4O5N1 | 5 | 0.8 | 0.8 |
| 61 | 186 | C6H4O7   | 5 | 1.2 | 0.7 |
| 62 | 218 | C6H4O9   | 5 | 1.5 | 0.7 |
| 63 | 220 | C6H5N1   | 5 | 0.0 | 0.8 |
| 64 | 123 | C6H5O3N1 | 5 | 0.5 | 0.8 |
| 65 | 139 | C6H5O4N1 | 5 | 0.7 | 0.8 |
| 66 | 141 | C6H5O5N1 | 5 | 0.8 | 0.8 |
| 67 | 171 | C6H5O6N1 | 5 | 1.0 | 0.8 |
| 68 | 187 | C6H5O7N1 | 5 | 1.2 | 0.8 |
| 69 | 203 | C6H5O7   | 4 | 1.2 | 1.0 |
| 70 | 189 | C6H5O8   | 4 | 1.3 | 1.0 |
| 71 | 235 | C6H5O9   | 4 | 1.5 | 1.0 |
| 72 | 110 | C6H6O3   | 4 | 0.5 | 1.0 |
| 73 | 126 | C6H6O4   | 4 | 0.7 | 1.0 |
| 74 | 142 | C6H6O4N1 | 4 | 0.7 | 1.2 |
| 75 | 156 | C6H6O5   | 4 | 0.8 | 1.0 |
| 76 | 172 | C6H6O6   | 4 | 1.0 | 1.0 |

|     |     |           |   |     |     |
|-----|-----|-----------|---|-----|-----|
| 77  | 204 | C6H6O8    | 4 | 1.3 | 1.0 |
| 78  | 222 | C6H6O10   | 4 | 1.7 | 1.0 |
| 79  | 111 | C6H7O3N1  | 4 | 0.5 | 1.2 |
| 80  | 141 | C6H7O4N1  | 4 | 0.7 | 1.2 |
| 81  | 157 | C6H7O5N1  | 4 | 0.8 | 1.2 |
| 82  | 173 | C6H7O6N1  | 4 | 1.0 | 1.2 |
| 83  | 175 | C6H7O7N1  | 4 | 1.2 | 1.2 |
| 84  | 207 | C6H7O8N1  | 4 | 1.3 | 1.2 |
| 85  | 199 | C7H3O7    | 6 | 1.0 | 0.6 |
| 86  | 154 | C7H6O4    | 5 | 0.6 | 0.9 |
| 87  | 170 | C7H6O5    | 5 | 0.7 | 0.9 |
| 88  | 218 | C7H6O8    | 5 | 1.1 | 0.9 |
| 89  | 232 | C7H6O8N1  | 5 | 1.1 | 1.0 |
| 90  | 153 | C7H7O3N1  | 5 | 0.4 | 1.0 |
| 91  | 169 | C7H7O4N1  | 5 | 0.6 | 1.0 |
| 92  | 155 | C7H7O4    | 4 | 0.6 | 1.1 |
| 93  | 185 | C7H7O5N1  | 5 | 0.7 | 1.0 |
| 94  | 171 | C7H7O5    | 4 | 0.7 | 1.1 |
| 95  | 201 | C7H7O6N1  | 5 | 0.9 | 1.0 |
| 96  | 187 | C7H7O6    | 4 | 0.9 | 1.1 |
| 97  | 217 | C7H7O7N1  | 5 | 1.0 | 1.0 |
| 98  | 203 | C7H7O7    | 4 | 1.0 | 1.1 |
| 99  | 233 | C7H7O8N1  | 5 | 1.1 | 1.0 |
| 100 | 219 | C7H7O8    | 4 | 1.1 | 1.1 |
| 101 | 140 | C7H8O3    | 4 | 0.4 | 1.1 |
| 102 | 156 | C7H8O4    | 4 | 0.6 | 1.1 |
| 103 | 172 | C7H8O5    | 4 | 0.7 | 1.1 |
| 104 | 188 | C7H8O6    | 4 | 0.9 | 1.1 |
| 105 | 204 | C7H8O7    | 4 | 1.0 | 1.1 |
| 106 | 220 | C7H8O8    | 4 | 1.1 | 1.1 |
| 107 | 236 | C7H8O9    | 4 | 1.3 | 1.1 |
| 108 | 250 | C7H8O9N1  | 4 | 1.3 | 1.3 |
| 109 | 155 | C7H9O3N1  | 4 | 0.4 | 1.3 |
| 110 | 171 | C7H9O4N1  | 4 | 0.6 | 1.3 |
| 111 | 187 | C7H9O5N1  | 4 | 0.7 | 1.3 |
| 112 | 203 | C7H9O6N1  | 4 | 0.9 | 1.3 |
| 113 | 219 | C7H9O7N1  | 4 | 1.0 | 1.3 |
| 114 | 235 | C7H9O8N1  | 4 | 1.1 | 1.3 |
| 115 | 251 | C7H9O9N1  | 4 | 1.3 | 1.3 |
| 116 | 267 | C7H9O10N1 | 4 | 1.4 | 1.3 |

|     |     |             |   |     |     |
|-----|-----|-------------|---|-----|-----|
| 117 | 182 | C8H6O5      | 6 | 0.6 | 0.8 |
| 118 | 213 | C8H7O6N1    | 6 | 0.8 | 0.9 |
| 119 | 199 | C8H7O6      | 5 | 0.8 | 1.0 |
| 120 | 229 | C8H7O7N1    | 6 | 0.9 | 0.9 |
| 121 | 215 | C8H7O7      | 5 | 0.9 | 1.0 |
| 122 | 168 | C8H8O4      | 5 | 0.5 | 1.0 |
| 123 | 184 | C8H8O5      | 5 | 0.6 | 1.0 |
| 124 | 200 | C8H8O6      | 5 | 0.8 | 1.0 |
| 125 | 216 | C8H8O7      | 5 | 0.9 | 1.0 |
| 126 | 230 | C8H8O7N1    | 5 | 0.9 | 1.1 |
| 127 | 183 | C8H9O4N1    | 5 | 0.5 | 1.1 |
| 128 | 199 | C8H9O5N1    | 5 | 0.6 | 1.1 |
| 129 | 215 | C8H9O6N1    | 5 | 0.8 | 1.1 |
| 130 | 231 | C8H9O7N1    | 5 | 0.9 | 1.1 |
| 131 | 295 | C8H9O11N1   | 5 | 1.4 | 1.1 |
| 132 | 228 | C9H8O7      | 6 | 0.8 | 0.9 |
| 133 | 211 | C9H9O5N1    | 6 | 0.6 | 1.0 |
| 134 | 229 | C9H9O7      | 5 | 0.8 | 1.1 |
| 135 | 259 | C9H9O8N1    | 6 | 0.9 | 1.0 |
| 136 | 307 | C9H9O11N1   | 6 | 1.2 | 1.0 |
| 137 | 182 | C9H10O4     | 5 | 0.4 | 1.1 |
| 138 | 198 | C9H10O5     | 5 | 0.6 | 1.1 |
| 139 | 214 | C9H10O6     | 5 | 0.7 | 1.1 |
| 140 | 230 | C9H10O7     | 5 | 0.8 | 1.1 |
| 141 | 262 | C9H10O9     | 5 | 1.0 | 1.1 |
| 142 | 213 | C9H11O5N1   | 5 | 0.6 | 1.2 |
| 143 | 229 | C9H11O6N1   | 5 | 0.7 | 1.2 |
| 144 | 293 | C9H11O10N1  | 5 | 1.1 | 1.2 |
| 145 | 309 | C9H11O11N1  | 5 | 1.2 | 1.2 |
| 146 | 242 | C10H10O7    | 6 | 0.7 | 1.0 |
| 147 | 257 | C10H11O7N1  | 6 | 0.7 | 1.1 |
| 148 | 273 | C10H11O8N1  | 6 | 0.8 | 1.1 |
| 149 | 305 | C10H11O10N1 | 6 | 1.0 | 1.1 |
| 150 | 353 | C10H11O13N1 | 6 | 1.3 | 1.1 |
| 151 | 282 | C11H6O9     | 9 | 0.8 | 0.5 |
| 152 | 284 | C11H8O9     | 8 | 0.8 | 0.7 |
| 153 | 347 | C11H9O12N1  | 8 | 1.1 | 0.8 |
| 154 | 286 | C11H10O9    | 7 | 0.8 | 0.9 |
| 155 | 285 | C11H11O8N1  | 7 | 0.7 | 1.0 |
| 156 | 301 | C11H11O9N1  | 7 | 0.8 | 1.0 |

|     |     |             |   |     |     |
|-----|-----|-------------|---|-----|-----|
| 157 | 349 | C11H11O12N1 | 7 | 1.1 | 1.0 |
| 158 | 256 | C11H12O7    | 6 | 0.6 | 1.1 |
| 159 | 272 | C11H12O8    | 6 | 0.7 | 1.1 |
| 160 | 288 | C11H12O9    | 6 | 0.8 | 1.1 |
| 161 | 287 | C11H13O8N1  | 6 | 0.7 | 1.2 |
| 162 | 303 | C11H13O9N1  | 6 | 0.8 | 1.2 |
| 163 | 319 | C11H13O10N1 | 6 | 0.9 | 1.2 |
| 164 | 300 | C12H12O9    | 7 | 0.8 | 1.0 |
| 165 | 332 | C12H12O11   | 7 | 0.9 | 1.0 |
| 166 | 348 | C12H12O12   | 7 | 1.0 | 1.0 |
| 167 | 282 | C13H14O7    | 7 | 0.5 | 1.1 |
| 168 | 330 | C13H14O10   | 7 | 0.8 | 1.1 |
| 169 | 394 | C13H14O14   | 7 | 1.1 | 1.1 |
| 170 | 345 | C13H15O10N1 | 7 | 0.8 | 1.2 |
| 171 | 393 | C13H15O13N1 | 7 | 1.0 | 1.2 |
| 172 | 326 | C14H14O9    | 8 | 0.6 | 1.0 |
| 173 | 324 | C15H16O8    | 8 | 0.5 | 1.1 |
| 174 | 356 | C15H16O10   | 8 | 0.7 | 1.1 |
| 175 | 372 | C15H16O11   | 8 | 0.7 | 1.1 |
| 176 | 403 | C15H17O12N1 | 8 | 0.8 | 1.1 |
| 177 | 368 | C16H16O10   | 9 | 0.6 | 1.0 |
| 178 | 366 | C17H18O9    | 9 | 0.5 | 1.1 |

Table S3. Assignment of 27 potential brown carbon molecules and 4 nitro aromatic compounds (red marks) in the gas phase detected at KIT Campus Nord, including mass, formula, double bond equivalent (DBE), the ratio of O/C, and the ratio of H/C.

| Number | Mass (g mol <sup>-1</sup> ) | Formula  | DBE | O/C | H/C |
|--------|-----------------------------|----------|-----|-----|-----|
| 1      | 135                         | C3H4O6   | 2   | 2.0 | 1.3 |
| 2      | 151                         | C3H5O6N1 | 2   | 2.0 | 1.7 |
| 3      | 84                          | C4H4O2   | 3   | 0.5 | 1.0 |
| 4      | 196                         | C4H4O9   | 3   | 2.3 | 1.0 |
| 5      | 163                         | C4H5O6N1 | 3   | 1.5 | 1.3 |
| 6      | 179                         | C4H5O7N1 | 3   | 1.8 | 1.3 |
| 7      | 206                         | C5H4O9   | 4   | 1.8 | 0.8 |
| 8      | 159                         | C5H5O6N1 | 4   | 1.2 | 1.0 |
| 9      | 175                         | C5H5O7N1 | 4   | 1.4 | 1.0 |
| 10     | 177                         | C5H5O8N1 | 4   | 1.6 | 1.0 |
| 11     | 114                         | C5H6O4   | 3   | 0.8 | 1.2 |
| 12     | 208                         | C5H6O9   | 3   | 1.8 | 1.2 |
| 13     | 147                         | C5H7O6N1 | 3   | 1.2 | 1.4 |
| 14     | 163                         | C5H7O7N1 | 3   | 1.4 | 1.4 |
| 15     | 123                         | C6H5O3N1 | 5   | 0.5 | 0.8 |
| 16     | 139                         | C6H5O4N1 | 5   | 0.7 | 0.8 |
| 17     | 156                         | C6H6O5   | 4   | 0.8 | 1.0 |
| 18     | 220                         | C6H6O9   | 4   | 1.5 | 1.0 |
| 19     | 222                         | C6H6O10  | 4   | 1.7 | 1.0 |
| 20     | 173                         | C6H7O6N1 | 4   | 1.0 | 1.2 |
| 21     | 175                         | C6H7O7N1 | 4   | 1.2 | 1.2 |
| 22     | 207                         | C6H7O8N1 | 4   | 1.3 | 1.2 |
| 23     | 221                         | C6H7O9N1 | 4   | 1.5 | 1.2 |
| 24     | 153                         | C7H7O3N1 | 5   | 0.4 | 1.0 |
| 25     | 169                         | C7H7O4N1 | 5   | 0.6 | 1.0 |
| 26     | 203                         | C7H9O6N1 | 4   | 0.9 | 1.3 |
| 27     | 219                         | C7H9O7N1 | 4   | 1.0 | 1.3 |
| 28     | 235                         | C7H9O8N1 | 4   | 1.1 | 1.3 |
| 29     | 184                         | C8H8O5   | 5   | 0.6 | 1.0 |
| 30     | 183                         | C8H9O4N1 | 5   | 0.5 | 1.1 |
| 31     | 262                         | C9H10O9  | 5   | 1.0 | 1.1 |



Table S4. Nitro aromatic compounds in gas phase detected at KIT Campus Nord, including chemical formula, concentration range, and average concentration (mean  $\pm$  standard deviation).

| Molecule                 | Formula                                                     | Concentration range (ng m <sup>-3</sup> ) | Average concentrations (ng m <sup>-3</sup> ) |
|--------------------------|-------------------------------------------------------------|-------------------------------------------|----------------------------------------------|
| 4-Nitrophenol            | C <sub>6</sub> H <sub>5</sub> O <sub>3</sub> N <sub>1</sub> | 0.01-2.0                                  | 0.2 $\pm$ 0.2                                |
| 4-Nitrocatechol          | C <sub>6</sub> H <sub>5</sub> O <sub>4</sub> N <sub>1</sub> | 0.01-2.9                                  | 0.5 $\pm$ 0.5                                |
| 2-Methyl-4-nitrophenol   | C <sub>7</sub> H <sub>7</sub> O <sub>3</sub> N <sub>1</sub> | 0.01-0.7                                  | 0.1 $\pm$ 0.09                               |
| 4-Methyl-5-nitrocatechol | C <sub>7</sub> H <sub>7</sub> O <sub>4</sub> N <sub>1</sub> | 0.01-1.9                                  | 0.3 $\pm$ 0.3                                |
| $\Sigma$ NACs            | -                                                           | 0.01-5.5                                  | 1.2 $\pm$ 0.9                                |

Table S5. Nitro aromatic compounds in particle phase detected at KIT Campus Nord, including chemical formula, coefficient (MAC), concentration range, and average concentration (mean  $\pm$  standard deviation).

| Molecule                 | Formula  | MAC ( $\text{m}^2 \text{g}^{-1}$ )* | Concentration range<br>( $\text{ng m}^{-3}$ ) | Average concentrations<br>( $\text{ng m}^{-3}$ ) |
|--------------------------|----------|-------------------------------------|-----------------------------------------------|--------------------------------------------------|
| 4-Nitrophenol            | C6H5O3N1 | 2.44                                | 0.01-1.7                                      | 0.5 $\pm$ 0.4                                    |
| 4-Nitrocatechol          | C6H5O4N1 | 7.02                                | 0.3-35.4                                      | 4.9 $\pm$ 5.1                                    |
| -                        | C6H5O5N1 | 14.00                               | 0.1-3.5                                       | 0.4 $\pm$ 0.4                                    |
| 2-Methyl-4-nitrophenol   | C7H7O3N1 | 3.15                                | 0.02-1.2                                      | 0.3 $\pm$ 0.2                                    |
| 4-Methyl-5-nitrocatechol | C7H7O4N1 | 12.90                               | 0.2-30.7                                      | 3.2 $\pm$ 3.9                                    |
| -                        | C7H7O5N1 | 14.00                               | 0.1-7.2                                       | 1.0 $\pm$ 1.0                                    |
| -                        | C8H9O5N1 | 14.00                               | 0.05-1.8                                      | 0.4 $\pm$ 0.3                                    |
| $\Sigma$ NACs            | -        |                                     | 0.7-95.0                                      | 11.7 $\pm$ 11.7                                  |

\* (Xie et al. 2017).

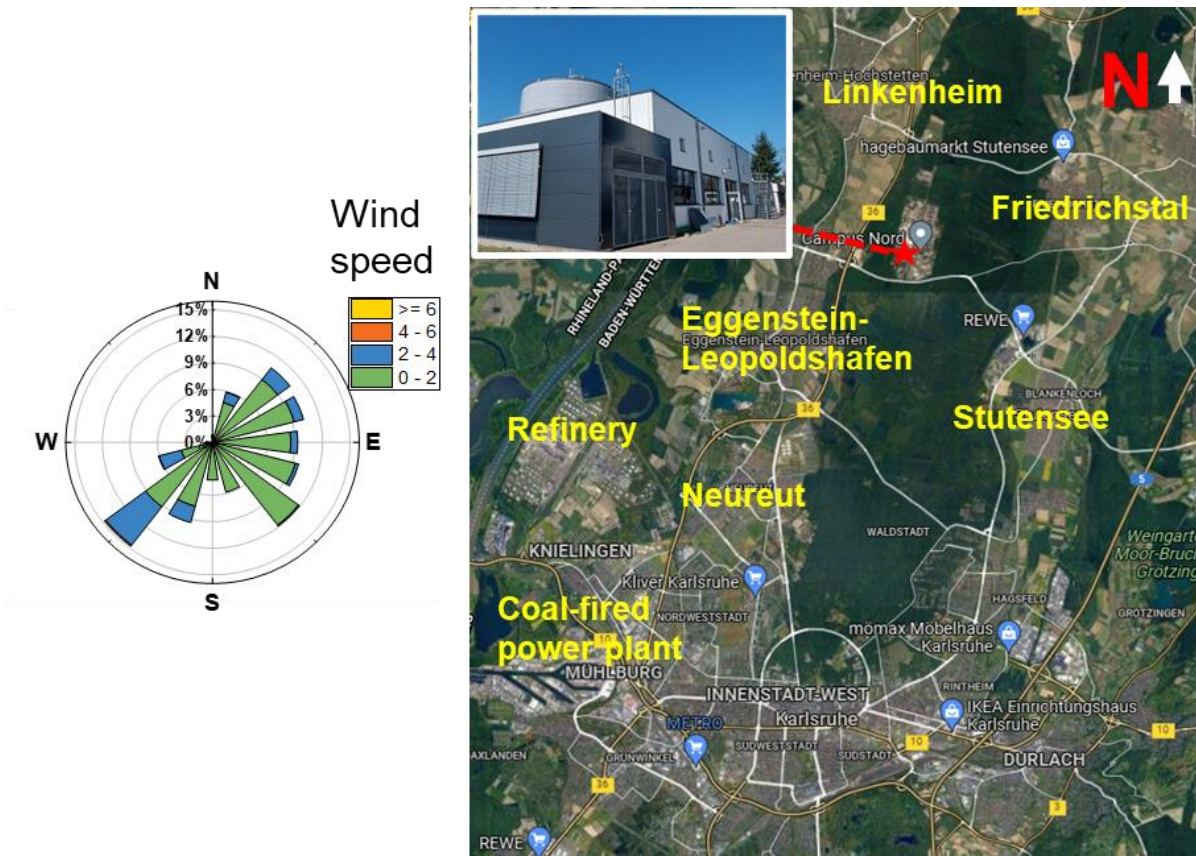

Figure S1. Wind roses (left) pattern, and measurement location map and container picture (right) pattern. Background map courtesy of © Google Maps.

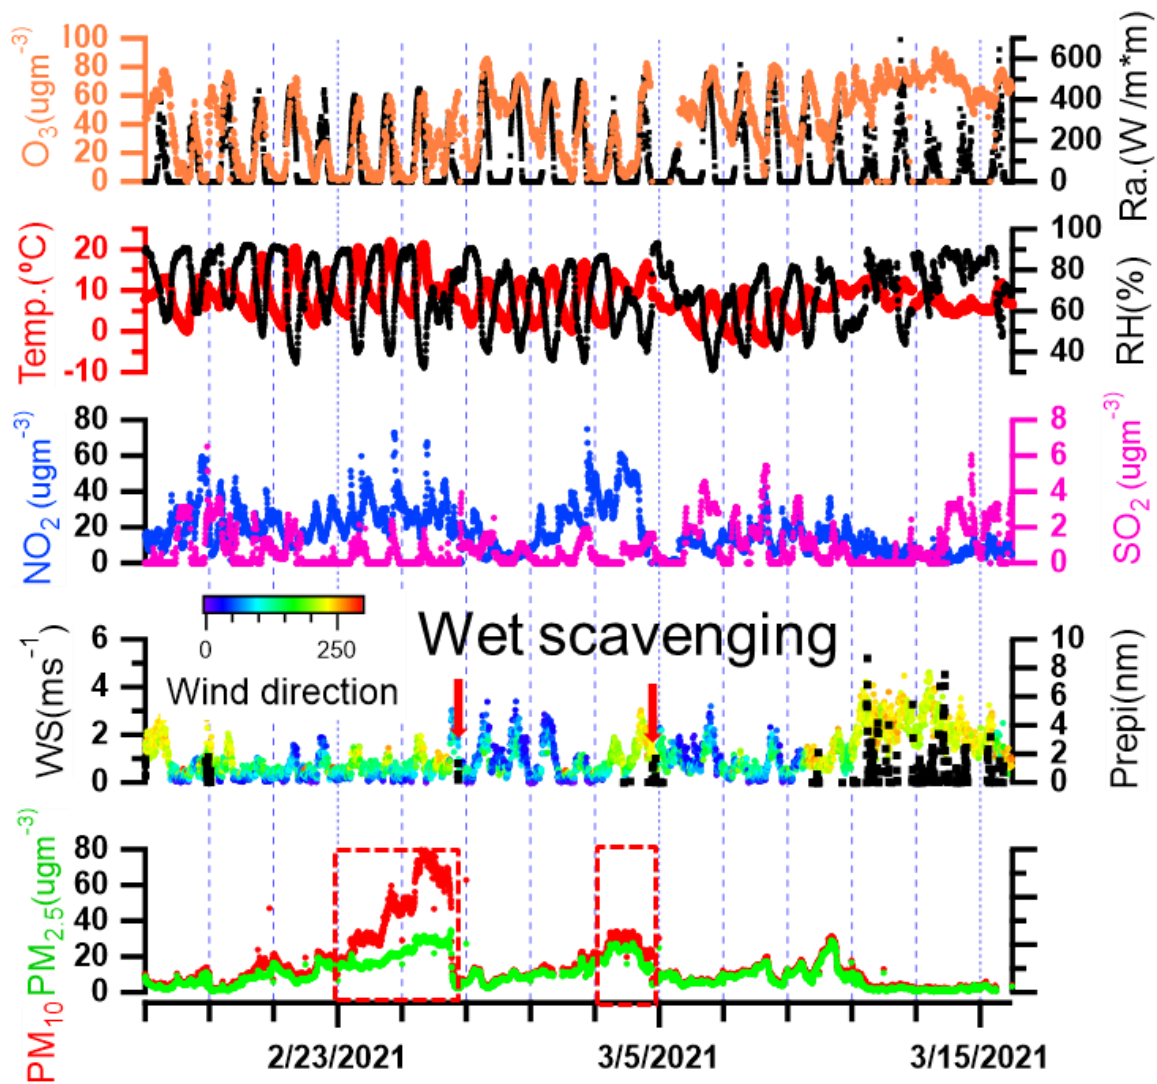

Figure S2 Overview of the meteorological parameters: trace gases ( $\text{NO}_2$ ,  $\text{O}_3$ , and  $\text{SO}_2$ ), temperature (T), radiation, relative humidity (RH), wind speed (WS), wind direction (WD), precipitation (Precipi), and  $\text{PM}_{2.5}$  and  $\text{PM}_{10}$  during the campaign. Red arrows indicate precipitation events leading to substantial removal of aerosol mass e.g. by wet scavenging at the end of periods with high pollution (dashed red boxes). Please note, that the first period was strongly influenced by Saharan dust (Cuevas-Agulló et al., 2023).

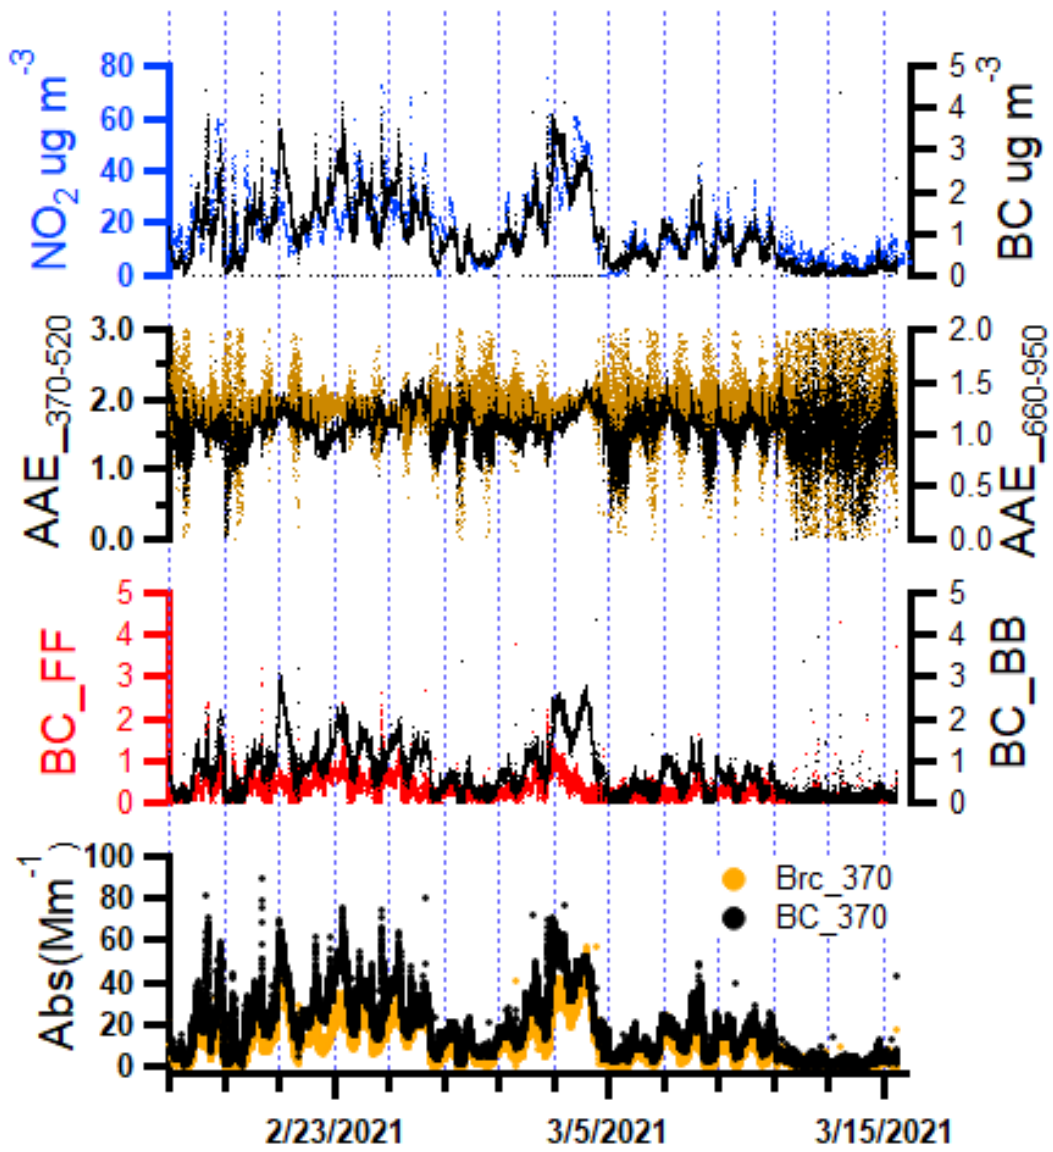

Figure S3. Overview of NO<sub>2</sub> and black carbon (BC), absorption Ångström exponents (AAE) at 370 to 520 nm (AAE<sub>370-520</sub>), AAE at 660 to 950 (AAE<sub>660-950</sub>), BC\_FF, BC\_BB, Abs<sub>370</sub> of BrC, and Abs<sub>370</sub> of BC.

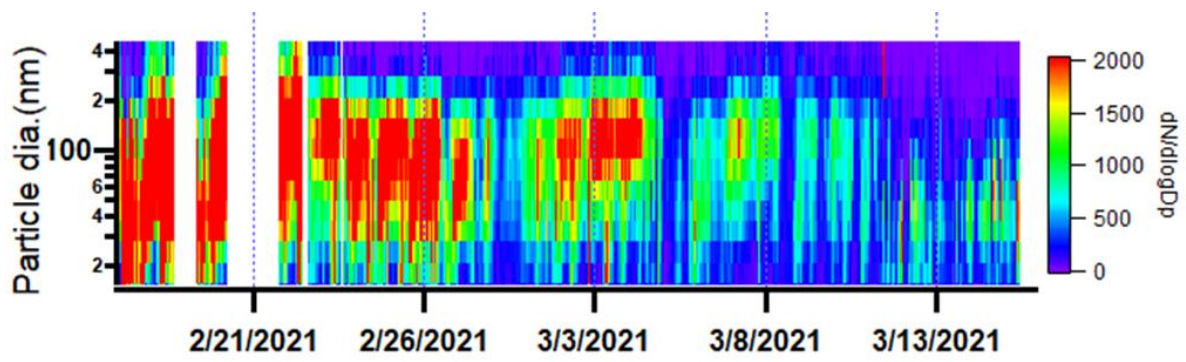

Figure S4. Particle size distributions measured with NanoScan between 10 and 410 nm.

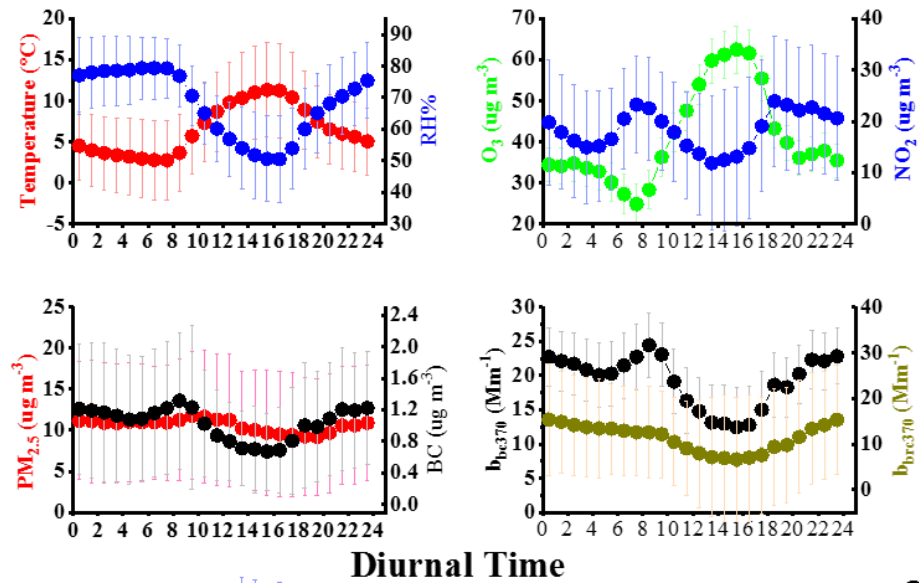

Figure S5. Diurnal variation of temperature, relative humidity, O<sub>3</sub>, NO<sub>2</sub>, PM<sub>2.5</sub>, BC, b<sub>bc370</sub> and b<sub>brc370</sub> for the whole measurement period.

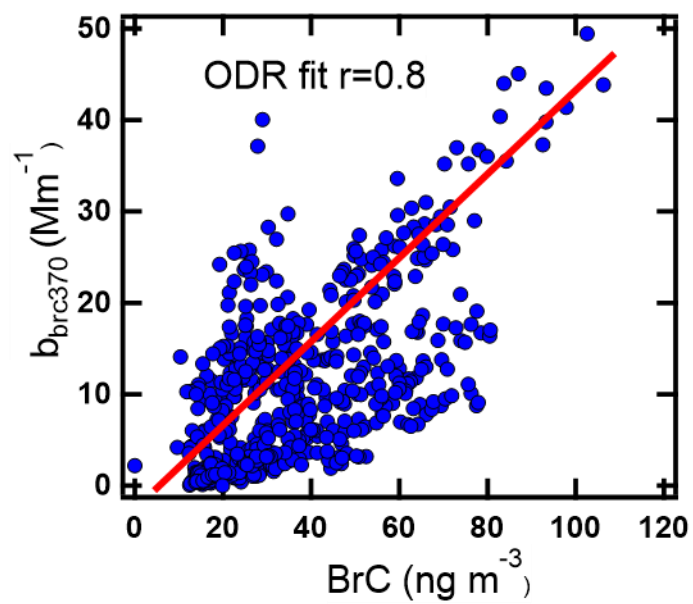

Figure S6. The correlation of BrC mass and absorption ( $b_{\text{brc}370}$ ).



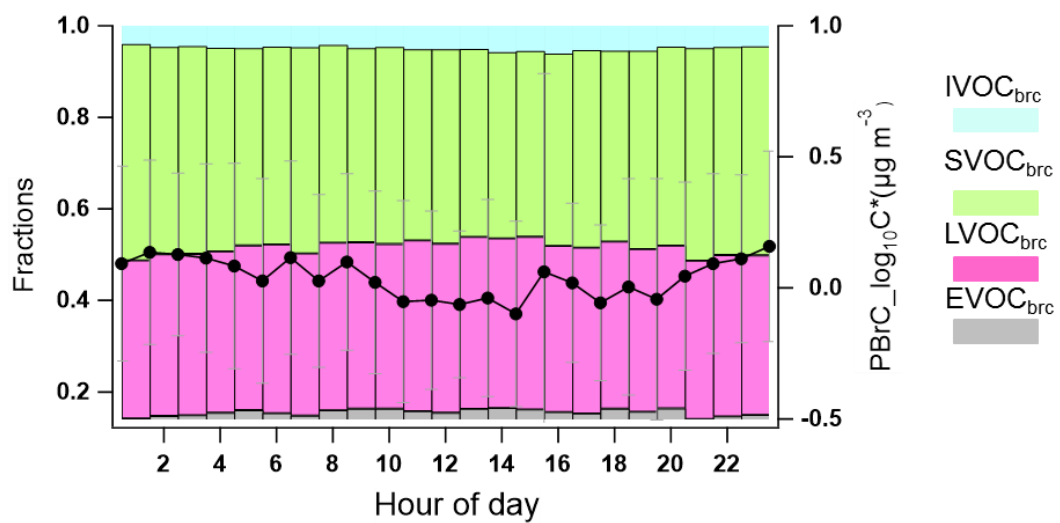

Figure S7. Diurnal profiles of LVOC<sub>brC</sub>, SVOC<sub>brC</sub>, IVOC<sub>brC</sub>, EVOC<sub>brC</sub>, and the average BrC volatility in the particle phase for the whole campaign (black circles).

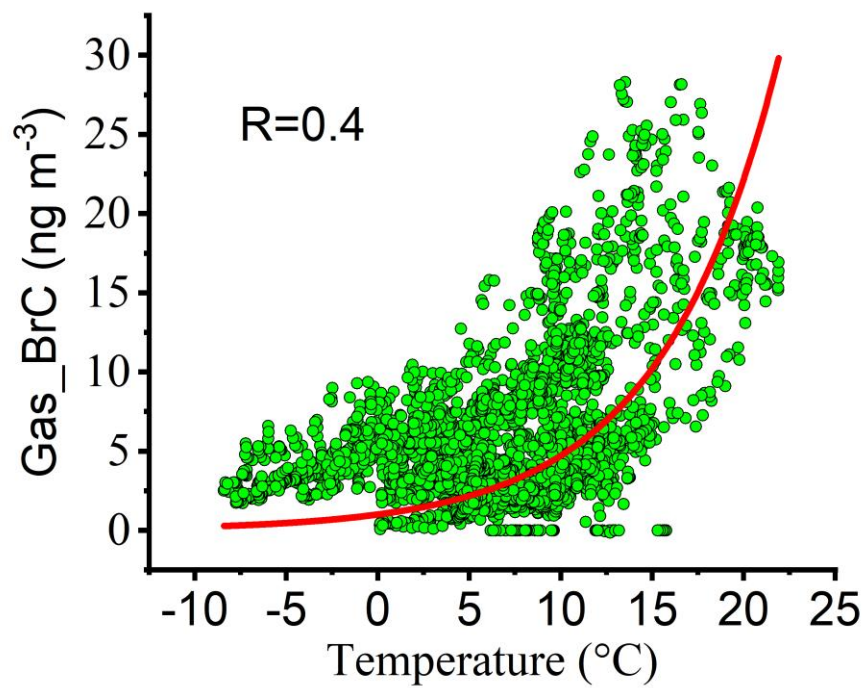

Figure S8. The correlation of gas-phase BrC and temperature based on exponential fit ( $y=e^{(0.15*x)}$ )

## Reference

- Cuevas-Agulló, E., Barriopedro, D., García, R. D., Alonso-Pérez, S., González-Alemán, J. J., Werner, E., Suárez, D., Bustos, J. J., García-Castrillo, G., García, O., Barreto, Á., and Basart, S.: Sharp increase of Saharan dust intrusions over the Western Mediterranean and Euro-Atlantic region in winters 2020-2022 and associated atmospheric circulation, *EGUsphere*, 2023, 1-39, 10.5194/egusphere-2023-1749, 2023.
- Xie, M., Chen, X., Hays, M. D., Lewandowski, M., Offenberg, J., Kleindienst, T. E., and Holder, A. L.: Light Absorption of Secondary Organic Aerosol: Composition and Contribution of Nitroaromatic Compounds, *Environ. Sci. Technol.*, 51, 11607–11616, <https://doi.org/10.1021/acs.est.7b03263>, 2017.
